# Supplementary material for: Mechanism of β-actin mRNA Recognition by ZBP1
Source: PubMed Central journal article supplement (PMC5300891; doi:10.1016/j.celrep.2016.12.091), 2017-01-31
Supplement: mmc1.pdf [file mmc1.pdf]

**Cell Reports, Volume 18**

**Supplemental Information**

**Mechanism of  $\beta$ -actin mRNA Recognition by ZBP1**

**Giuseppe Nicastro, Adela M. Candel, Michael Uhl, Alain Oregioni, David Hollingworth, Rolf Backofen, Stephen R. Martin, and Andres Ramos**

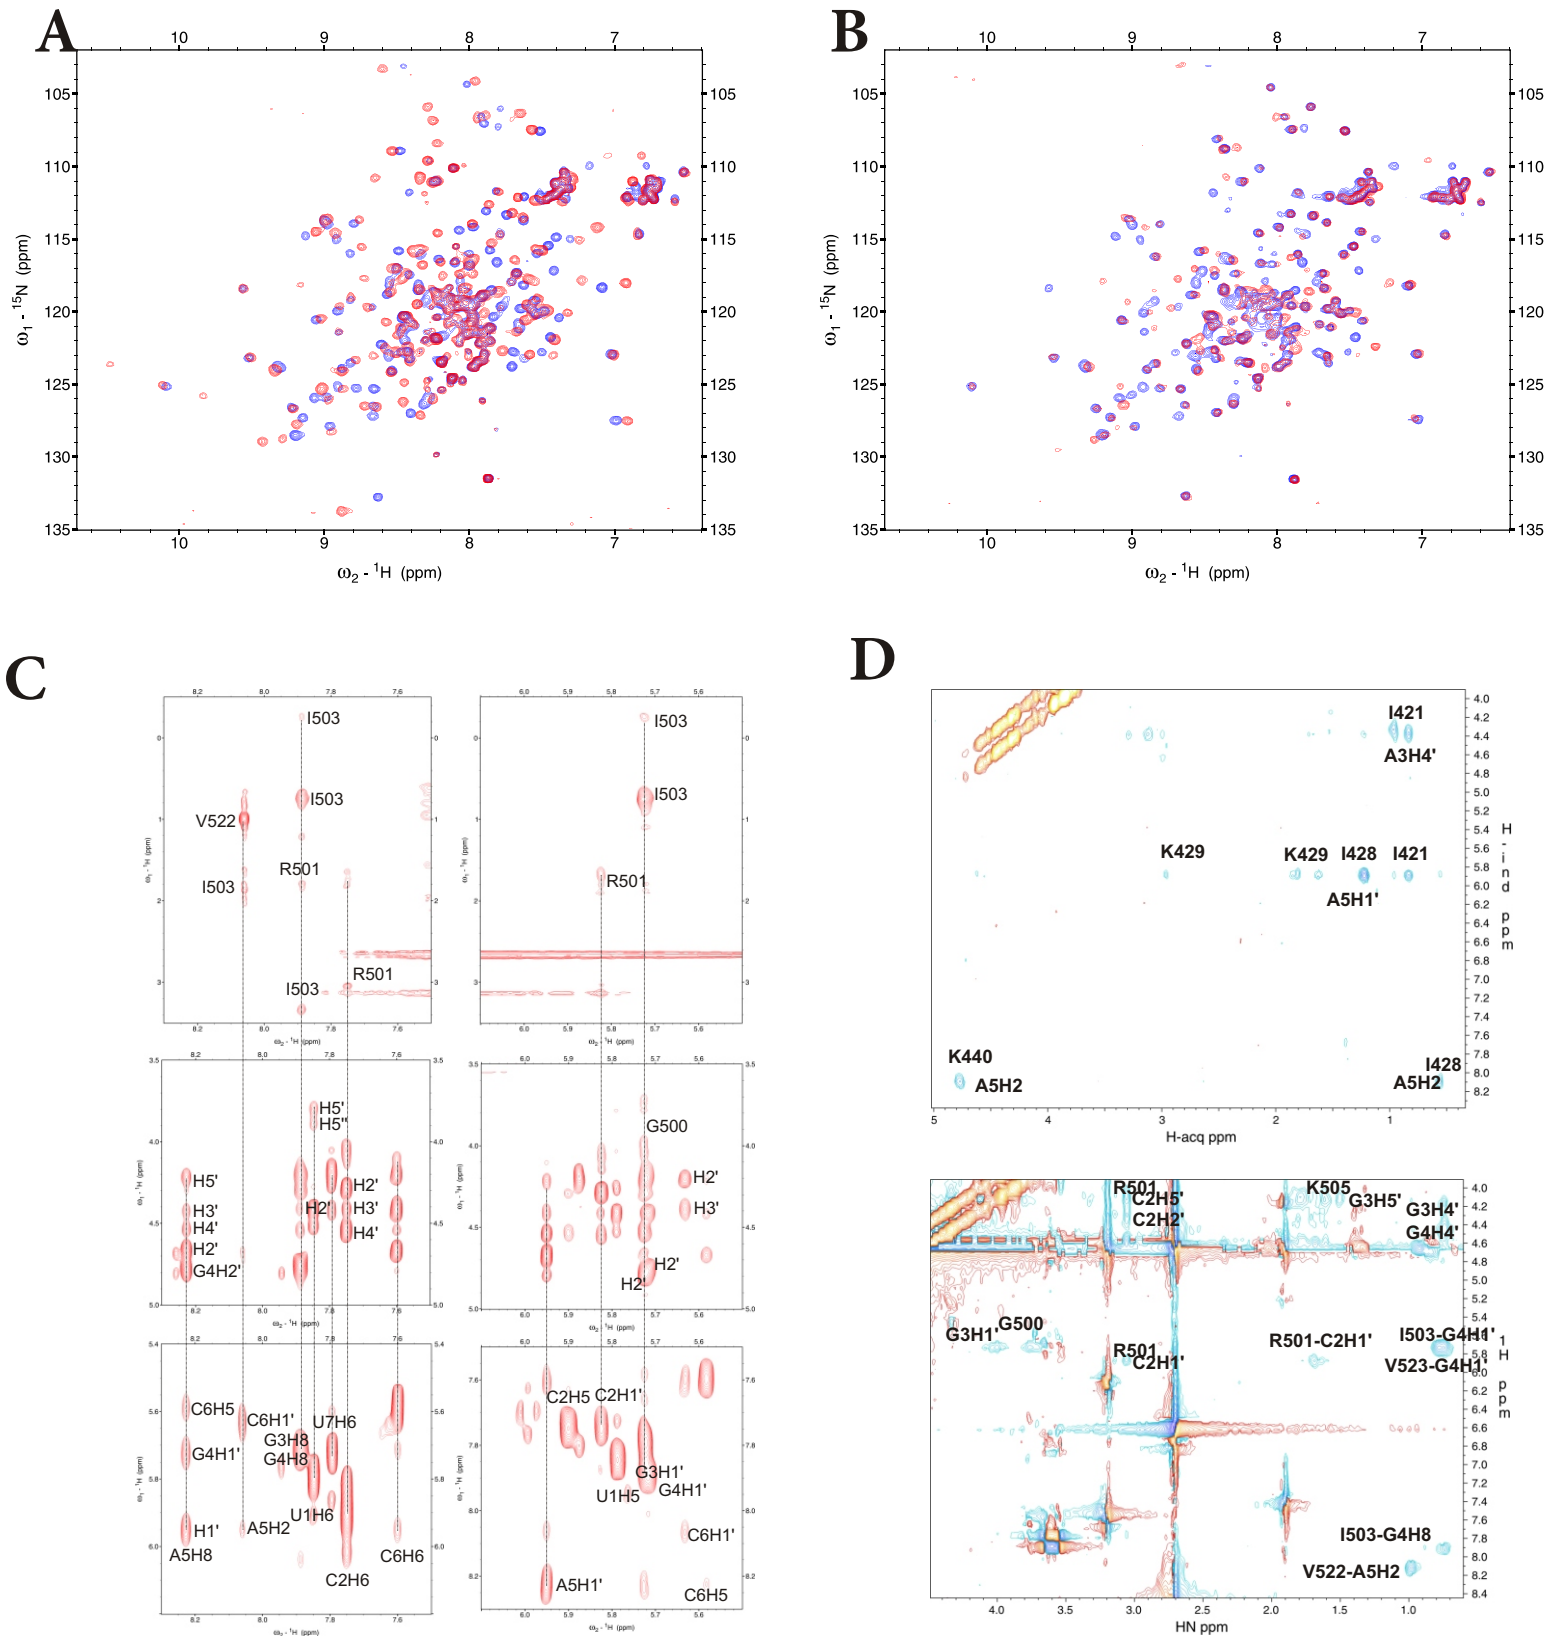

Figure S1 - NMR of the ZBP1 KH3-KH4-RNA complexes, related to Figures 2 and 3. (A) Overlay of free (blue) and bound (red)  ${}^{15}\text{N}$  HSQC spectra of KH3-KH4DD (KH3 binding)-RNA complex (B) Overlay of free (blue) and bound (red)  ${}^{15}\text{N}$  HSQC spectra of KH3DD-KH4 (KH4 binding)-RNA complex (C)

Homonuclear  ${}^1\text{H}$ - ${}^1\text{H}$  spectrum

(250ms mixing time) recorded on a sample of KH3DD-KH4 (KH4 binding)-RNA complex. Representative intermolecular NOE cross-peaks are labelled. Some intra-molecular NOEs are also labelled for comparison.

(D) 2D- $({}^1\text{H}$ - ${}^1\text{H})$  F1- ${}^{13}\text{C}$  filtered, F2- ${}^{13}\text{C}$  edited NOESYs recorded on samples of KH3-KH4DD (KH3 binding)-RNA and KH3DD-KH4 (KH4 binding)-RNA complexes. Representative NOEs cross-peaks are labelled. Some intra-molecular NOEs are also labelled for comparison.

**Figure S1**

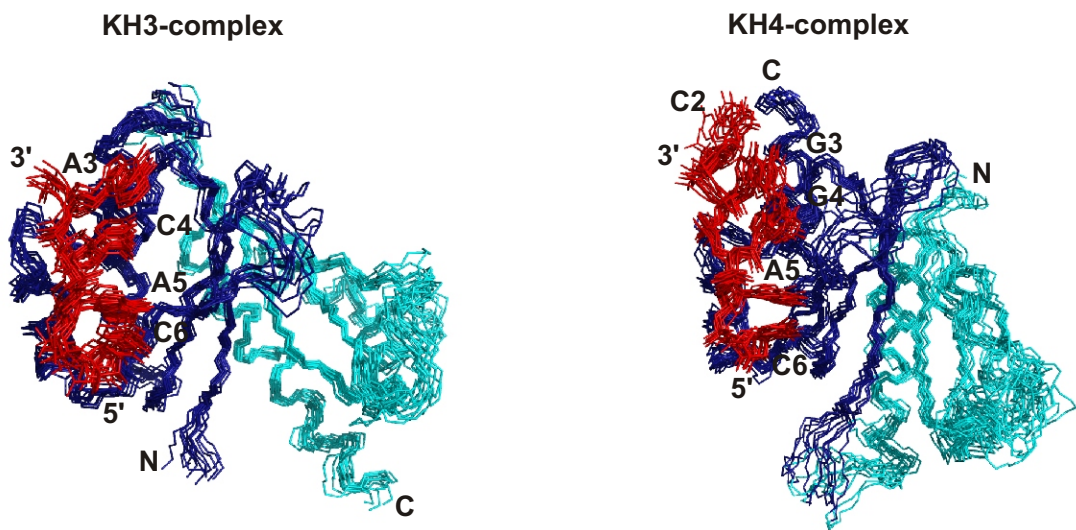

Figure S2 - NMR structures bundle. Superimposition of the 12 lowest energy solution structures of ZBP1 KH3-KH4DD-RNA complex (left) and ZBP1 KH3DD-KH4-RNA complex (right), related to Figures 2 and 3. The protein backbone is in blue (with the interacting domain in dark blue) and the RNA backbone in red. The variable loop of KH4 is less well defined than for KH3, consistently with the dynamics observed in the variable loop (Figure S4).

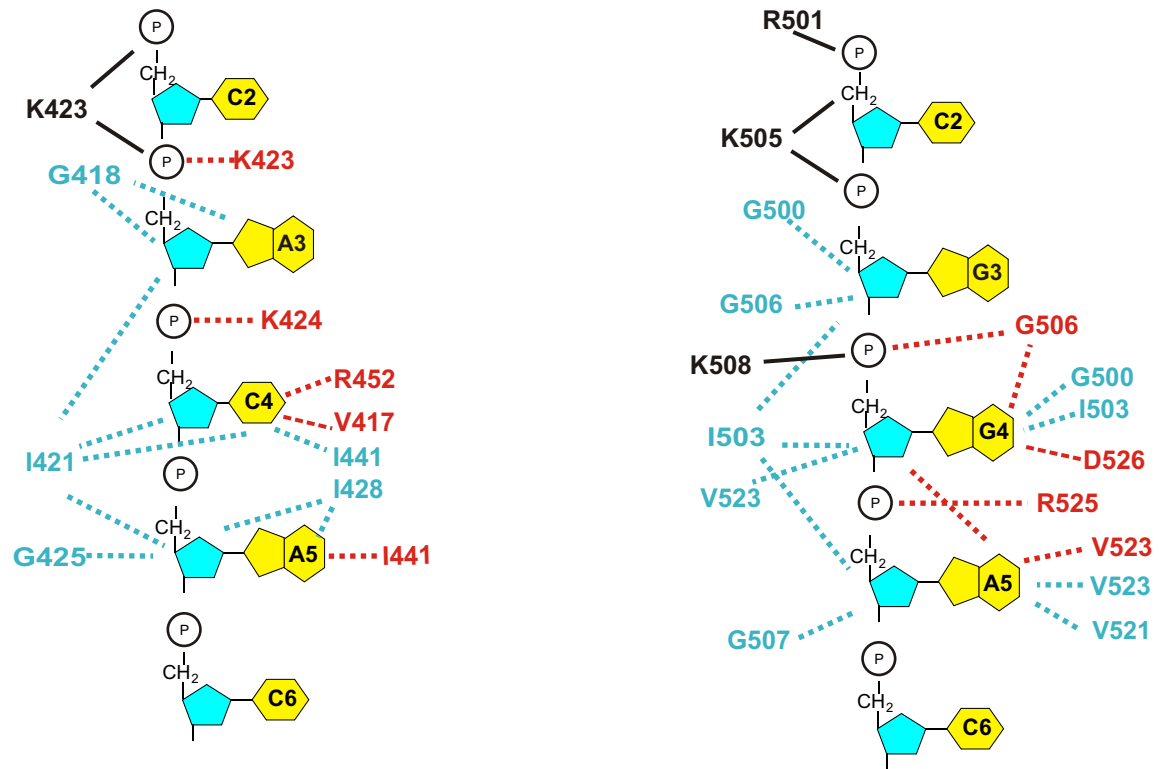

Figure S3 - Protein-RNA contacts in the KH3-RNA and KH4-RNA binding complexes, related to Figures 2 and 3. Protein-RNA contacts observed in KH3-KH4DD-RNA (KH3 binding, left) and KH3DD-KH4-RNA (KH4 binding, right) complexes. Hydrogen bonds are in red, hydrophobic interactions are in blue and electrostatic interactions involving phosphate group are represented by a black line. Contacts observed in the majority of structures in the bundle are reported.

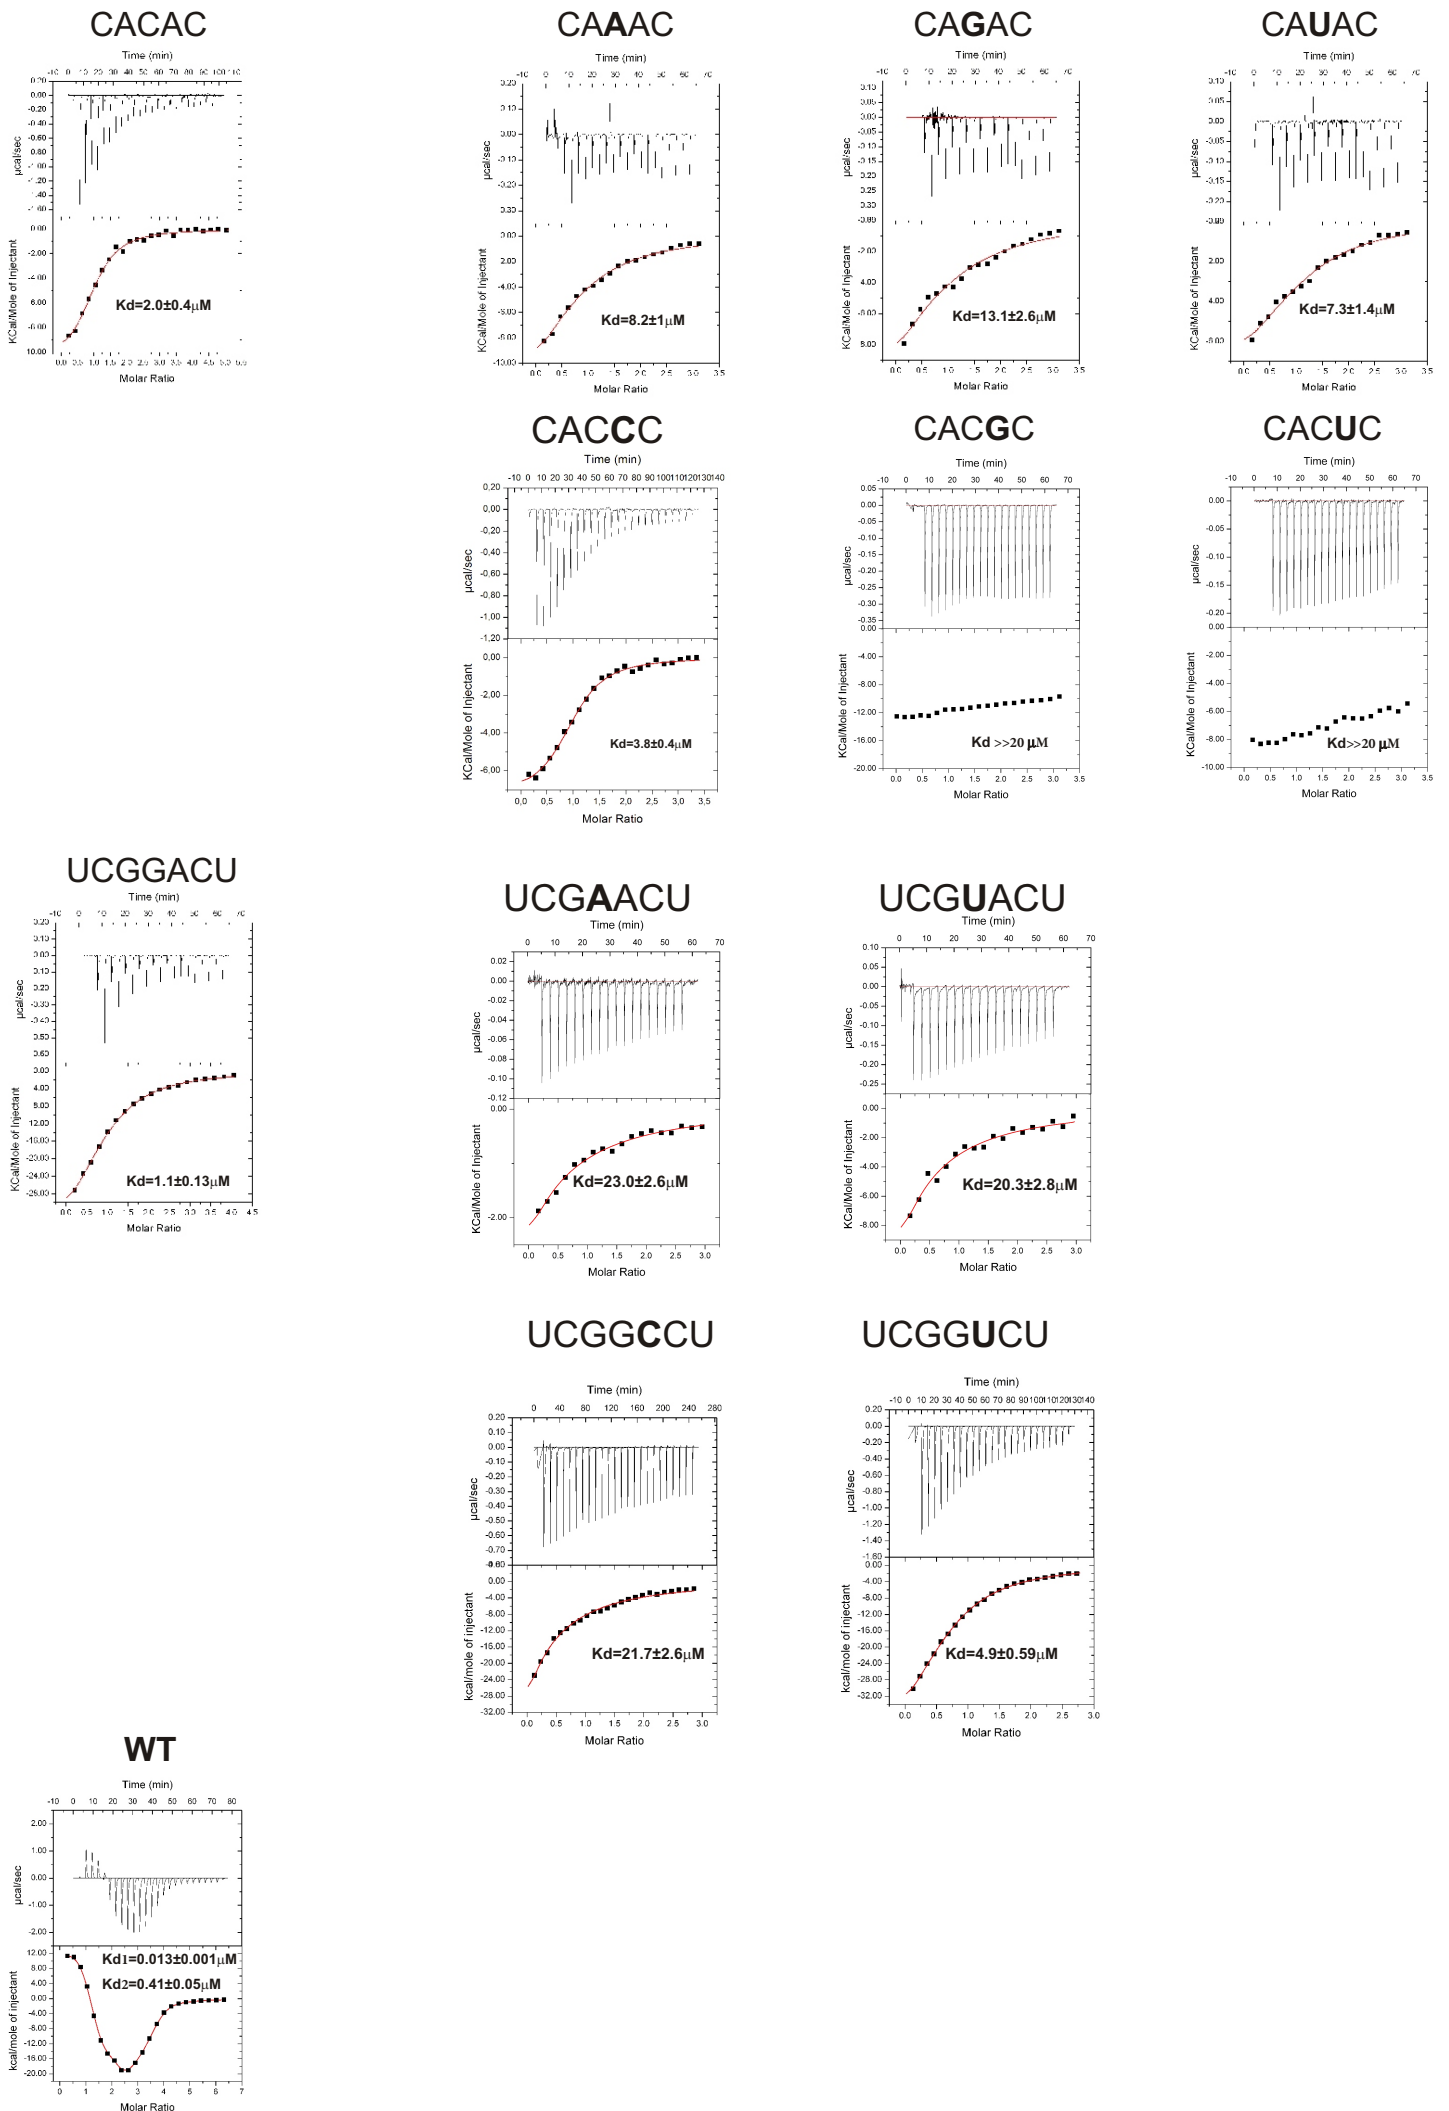

Figure S4

Figure S4 - Nucleobase preference of KH3 and KH4. ITC titrations of the KH3-KH4DD and KH3DD-KH4 proteins with the target RNA sequences and with single nucleotide mutations, related to Figures 2 and 3. Experiments were performed at 25°C in 20 mM phosphate buffer pH 6.5 and 100mM NaCl. Top – baseline corrected calorimetric titration data. Bottom - binding isotherm derived by integrating the area of each peak after each injection. The solid line represents the best fit of the data to a single binding site model. Kd values are reported on each plot. Also an equivalent titration was performed on the KH3-KH4 (bottom) protein with the 28 nucleotides Zipcode RNA. Here two binding events are visible, the specific high affinity binding with a Kd of approximately 13 nM.

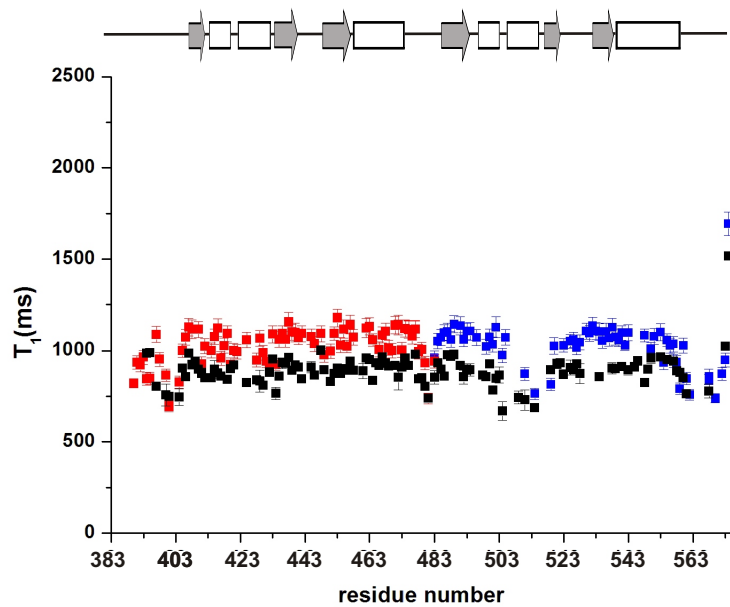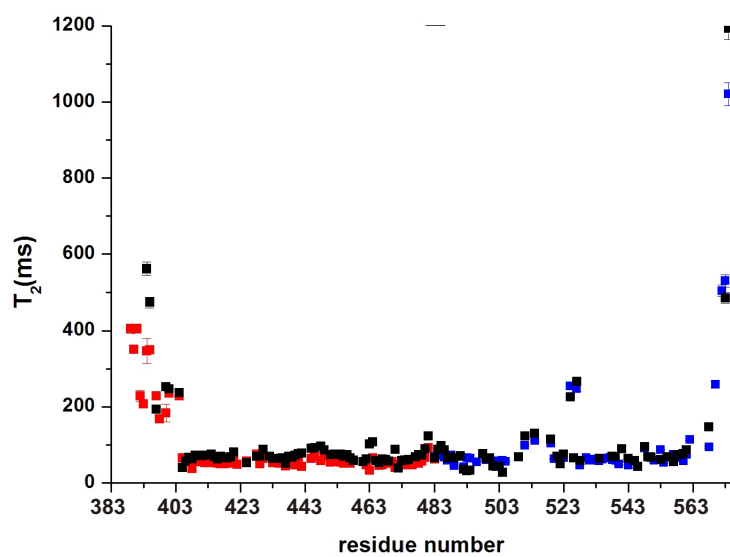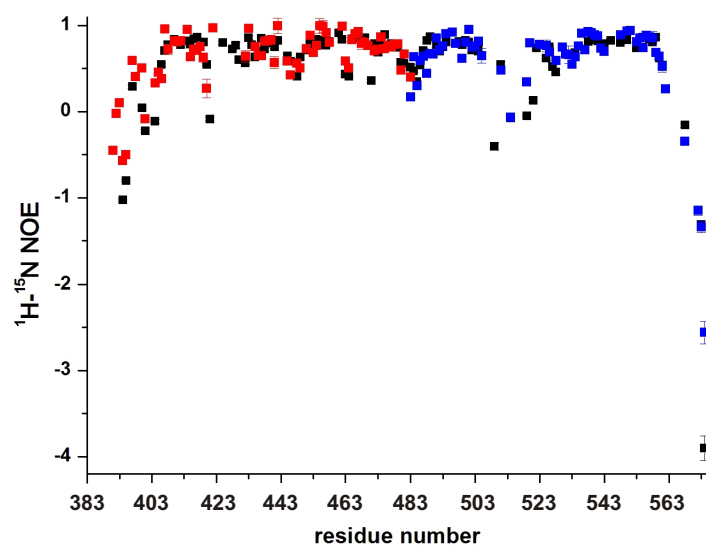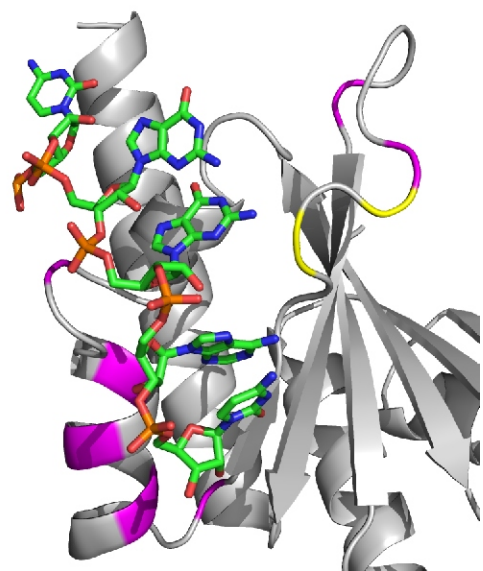

Figure S5

Figure S5 - KH3-KH4 backbone dynamics and changes upon RNA binding, related to Figure 4.

Left - Backbone relaxation of free and bound KH3-KH4.  $^{15}\text{N}$  T1 (top),  $^{15}\text{N}$  T2 (middle) and  $^{15}\text{N}\{^1\text{H}\}$  heteronuclear NOE (bottom) values are plotted against residue number. Free protein values are in black.

KH3-bound values are in red and KH4-bound values are in blue. For simplicity, only the values of the bound domains in the two-domain complexes (KH3 in one case and KH4 in the other) are displayed, as the trend of values of the unbound domains is the same as in the free protein. Changes in the overall T1 and T2 values are consistent with the small increase in molecular weight upon RNA binding. Secondary structure elements are displayed above. Right – the residues of the KH4 domain with heteronuclear NOE values of  $<0.6$  (magenta, high frequency motions) and with T2 values of  $> 200$  ms (yellow, low frequency motions) are colored on the backbone ribbon representation of the bound KH4 which is otherwise in grey).



## Table S1

Change in the population of the bound RNA species in function of kC3, related to Figure 6

| kC3 | kC4       | Free[RNA] | [Protein] | Total RNA bound | RNA bound as C | RNA % bound as C | Kd       | koff     |
|-----|-----------|-----------|-----------|-----------------|----------------|------------------|----------|----------|
| 0.1 | 0.466666  | 2.17E-10  | 2.00E-07  | 1.83E-10        | 1.02E-10       | 4.57E+01         | 2.38E-07 | 2.92E-02 |
| 0.2 | 0.933333  | 1.73E-10  | 2.00E-07  | 2.27E-10        | 1.62E-10       | 5.67E+01         | 1.53E-07 | 2.01E-02 |
| 0.5 | 2.333333  | 1.08E-10  | 2.00E-07  | 2.92E-10        | 2.52E-10       | 7.31E+01         | 7.38E-08 | 1.09E-02 |
| 1   | 4.666666  | 6.61E-11  | 2.00E-07  | 3.34E-10        | 3.09E-10       | 8.35E+01         | 3.96E-08 | 6.25E-03 |
| 1.5 | 6.999999  | 4.77E-11  | 2.00E-07  | 3.52E-10        | 3.35E-10       | 8.81E+01         | 2.71E-08 | 4.41E-03 |
| 2   | 9.333333  | 3.73E-11  | 2.00E-07  | 3.63E-10        | 3.49E-10       | 9.07E+01         | 2.06E-08 | 3.42E-03 |
| 3   | 14        | 2.60E-11  | 2.00E-07  | 3.74E-10        | 3.64E-10       | 9.35E+01         | 1.39E-08 | 2.37E-03 |
| 4   | 18.666666 | 1.99E-11  | 2.00E-07  | 3.80E-10        | 3.73E-10       | 9.50E+01         | 1.05E-08 | 1.82E-03 |
| 6   | 28        | 1.36E-11  | 2.00E-07  | 3.86E-10        | 3.81E-10       | 9.66E+01         | 7.04E-09 | 1.25E-03 |
| 8   | 37.33333  | 1.03E-11  | 2.00E-07  | 3.90E-10        | 3.86E-10       | 9.74E+01         | 5.30E-09 | 9.64E-04 |
| 10  | 46.666666 | 8.32E-12  | 2.00E-07  | 3.92E-10        | 3.89E-10       | 9.79E+01         | 4.25E-09 | 7.91E-04 |

Total [RNA] = 4E-10

RNA bound as C = RNA bound in the closed complex

RNA % bound as C = percentage of the total bound RNA present in the closed complex form

## Table S2

Variation in the amount of bound RNA in function of ZBP1 concentration, related to Figure 6

| [Protein] | [RNA]    | Total RNA bound | RNA bound as C | % RNA bound as C |
|-----------|----------|-----------------|----------------|------------------|
| 5.00E-09  | 3.23E-10 | 7.72E-11        | 7.44E-11       | 1.93E+01         |
| 1.00E-08  | 2.70E-10 | 1.30E-10        | 1.25E-10       | 3.24E+01         |
| 2.50E-08  | 1.82E-10 | 2.19E-10        | 2.11E-10       | 5.46E+01         |
| 5.00E-08  | 1.17E-10 | 2.83E-10        | 2.73E-10       | 7.07E+01         |
| 1.00E-07  | 6.84E-11 | 3.32E-10        | 3.19E-10       | 8.29E+01         |
| 2.00E-07  | 3.73E-11 | 3.63E-10        | 3.49E-10       | 9.07E+01         |
| 4.00E-07  | 1.95E-11 | 3.81E-10        | 3.65E-10       | 9.51E+01         |
| 6.00E-07  | 1.32E-11 | 3.87E-10        | 3.70E-10       | 9.67E+01         |

Total [RNA] 4E-10

kC3=2

kC4=9.3333

## Supplemental Experimental Procedures

### *Resonance assignment and structure calculations*

Protein backbone and side-chain resonance assignments were obtained from 2D  $^1\text{H}$ - $^{15}\text{N}$  HSQC, 2D  $^1\text{H}$ - $^{13}\text{C}$  HSQC, 3D HNCA, 3D CBCACONH, 3D HNCACB, 3D [ $^1\text{H}$ - $^{13}\text{C}$ - $^1\text{H}$ ] HCCH-TOCSY, [ $^{13}\text{C}$ - $^{13}\text{C}$ - $^1\text{H}$ ] HCCH-TOCSY, 3D  $^{15}\text{N}$  NOESY-HSQC, 3D  $^{13}\text{C}$ -NOESY-HSQC experiments, optimized for either aliphatic and aromatic resonances, as previously described (Nicastro et al., 2012). Resonance assignments of the two RNA oligonucleotides, free and in complex were obtained from 2D  $^1\text{H}$ - $^1\text{H}$  TOCSY, 2D  $^1\text{H}$ - $^1\text{H}$  NOESY either decoupled or un-decoupled. NOESY spectra were recorded using mixing times of 100, 150 and 250ms depending on the sample. TOCSY spectra were recorded using a mixing time of 60ms. Intramolecular NOEs were obtained from 3D  $^{15}\text{N}$  NOESY-HSQC, 3D  $^{13}\text{C}$ -NOESY-HSQC experiments. Inter-molecular NOEs were obtained as described in the methods section.

The structures of the KH3–GCACACC and KH4-UCGGACU complexes were calculated using the protocol described (Nicastro et al., 2012) with a few variations as described below. Briefly, the structures were calculated using a semi-automated ARIA 2.3–based protocol (Linge et al., 2003). Distance restraints were obtained by integrating NOE cross-peaks in 3D and 2D NOESY spectra using the XEASY program (Bartels et al., 1995). The protein-protein NOE cross-peaks were calibrated automatically and assigned iteratively within ARIA, whereas the peaks arising from RNA proton resonances were calibrated manually in a semi-quantitative fashion (Varani et al., 1996). Protein angle restraints were obtained from the chemical shifts of CO, CA, CB and backbone amide N and NH moieties using the program TALOS. RNA angle restraints ( $\alpha$ ,  $\zeta$  and  $\delta$ ) were obtained from  $^1\text{H}$ - $^1\text{H}$  TOCSY spectra and  $^3\text{P}$ - $^1\text{H}$  correlation spectra. Hydrogen bond restraints were added only in the final set of calculations and only in well-defined secondary structure elements if a proton was hydrogen-bonded in at least 50% of the initial set of structures. Further, the structures of both the KH3 and the KH4 complex show the canonical double H-bond between the nucleobase in position 3 and the protein backbone in the initial set of structures and these hydrogen bonds were added at the last step of the calculations.

ARIA 2.3 was used to calculate 100 conformers of the complex (iterations 0–7). The 20 conformers with the lowest restraint energies were refined in a shell of explicit water. The 12 conformers with the lowest restraint energies, restraint violations and r.m.s. deviations from the ideal covalent geometry were taken as representative of the converged structures and selected for structural analysis. Structural statistics were computed for ensemble of 12 deposited structures using PSVS 1.5. The Ramachandran plot analysis for the two families of structures showed that for ordered residues ( $[\text{S}(\phi)+\text{S}(\psi)] > 1.8$ ): 405-422, 425-479, 482-503, 509-525, 529-565 of KH3, 95.5% are in the most favored, 4.4 % additional, 0.1% generously and 0% disallowed regions respectively, and for ordered residues of KH4 (406-422, 425-443, 450-479, 485-503, 508-523, 529-565) 93.5% are in the most favored, 6.5% additional, 0% generously and 0.1% disallowed regions respectively.

### *Calculation of $kC3$ and $kC4$*

To calculate  $kC3$ , we consider the pathway for formation of the closed complex in which the KH4 domain attaches first (see Figure 5). This pathway is effectively a simple reversible bimolecular reaction followed by a conformational change that can be summarized as:

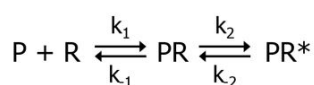

For a reaction of this type the experimentally measured equilibrium dissociation constant ( $K_d$ ) is related to the individual constants ( $K_{d1}$  and  $K_{d2}$ ) by  $K_d = K_{d1}K_{d2}/(1+K_{d2})$

(Eccleston et al., 2008). For the purpose of calculating  $k_{C3}$ , the reaction can be written as:

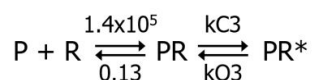

Therefore in our case  $K_{d1} = 0.13/1.4 \times 10^5 = 9.286 \times 10^{-7}$  M and  $K_{d2} = k_{O3}/k_{C3}$ . Since the experimentally measured  $K_d$  is  $2.06 \times 10^{-8}$  M one has

$$2.06 \times 10^{-8} = 9.286 \times 10^{-7} \times K_{d2}/(1+K_{d2})$$

$$0.0222 = K_{d2}/(1+K_{d2}) \text{ and therefore } K_{d2} = 0.0227$$

If we assume for the sake of simplicity that the ring opening step ( $k_{O3}$ ) in which  $KH3$  dissociates to reform the 1:1 complex has the same rate constant as that for dissociation from the appropriate 1:1 complex then  $k_{O3} = 0.046 \text{ s}^{-1}$ .

$$\text{Then } K_{d2} = 0.0227 = 0.046/k_{C3} \text{ and } k_{C3} = \sim 2 \text{ s}^{-1}$$

The same calculation for the other pathway would mean that  $k_{C4}$  was equal to  $\sim 9.3 \text{ s}^{-1}$ .

#### *Supplemental references*

Bartels, C., Xia, T., Billeter, M., Guntert, P., and Wuthrich, K. (1995). The program XEASY for computer supported NMR spectral analysis of biological macromolecules. *J. Biomol. NMR* 6, 1–10.

Eccleston JF, Martin SR, Schilstra MJ (2008) Rapid kinetic techniques. *Meth. Cell Biol.* 84, 445-477.

Kay, L.E., Torchia, D.A. and Bax, A. (1989). Backbone dynamics of proteins as studied by  $^{15}\text{N}$  inverse detected heteronuclear NMR spectroscopy: application to staphylococcal nuclease. *Biochemistry* 28, 8972-8979.

Linge, J.P., Habeck, M., Rieping, W., and Nilges, M. (2003). ARIA: automated NOE assignment and NMR structure calculation. *Bioinformatics* 19, 315–316.

Nicastro, G., García-Mayoral, M.F., Hollingworth, D., Kelly, G., Martin, S.R., Briata, P., Gherzi, R., and Ramos, A. (2012). Noncanonical G recognition mediates KSRP regulation of let-7 biogenesis. *Nat. Struct. Mol. Biol.* 19, 1282-1286.

Varani, G., Fareed, Aboul-ela., & Allain, Frederic-H-T. NMR investigation of RNA structure *Prog. Nucl. Magn. Reson. Spectrosc.* 29, 51–127 (1996).
